# Supplementary material
Source: Royal Society of Chemistry journal article supplement (doi:10.1039/d6sm00247a)
Supplement: d6sm00247a1.pdf [file d6sm00247a1.pdf]

## Supporting Information

# Sequential Reaction Control during *In-situ* Polymerization and Formation Processes of Reactive Polyurethane Coatings via Adjusting Molecular Weight and Isocyanate Content of the Prepolymer

Bin Zhao,<sup>1,2</sup> Huawei Xu,<sup>3</sup> Jie Liu,<sup>3</sup> Junfeng Zhang,<sup>3</sup> Huimin Duan,<sup>\*1,2,4</sup> Peter Müller-Buschbaum,<sup>5</sup> Wengxin Chen,<sup>1,2,4</sup> Dongming Qi,<sup>\*1,2,4</sup> and Qi Zhong<sup>\*1,2,4,5</sup>.

*1. National Base for International Science and Technology Cooperation in Textiles and Consumer-Goods Chemistry & Zhejiang Provincial Engineering Research Center for Green and Low-Carbon Dyeing & Finishing Zhejiang Sci-Tech University*

*Hangzhou 310018, P. R. China.*

*2. State Key Laboratory of Bio-based Fiber Materials, Zhejiang Sci-Tech University*

*Hangzhou 310018, P. R. China.*

*3. Hexin Kuraray Micro Fiber (Haiyan) Co. Ltd., 383 Haihe Road, 314305 Jiaxing, China.*

*4. Zhejiang Provincial Innovation Center of Advanced Textile Technology, Shaoxing 312000, P.R. China.*

*5. Technical University of Munich, TUM School of Natural Sciences, Department of Physics, Chair for Functional Materials, James-Franck-Str. 1, 85748, Garching, Germany*

**Table S1.** GPC data of different RPU coatings measured after initialization of reaction for 0, 5, 10, 15, 20, and 120 min.

| Reaction Time(min) | Pre-SC/NCO-20 | PDI  | Pre-SC/NCO-24 | PDI  | Pre-LC/NCO-20 | PDI  | Pre-LC/NCO-24 | PDI  |
|--------------------|---------------|------|---------------|------|---------------|------|---------------|------|
| 0                  | 4120          | 1.18 | 2397          | 1.34 | 9566          | 1.24 | 8789          | 1.27 |
| 5                  | 10323         | 3.83 | 28655         | 4.38 | 17634         | 2.43 | 17750         | 2.19 |
| 10                 | 12040         | 4.34 | 27483         | 4.32 | 20177         | 3.06 | 18677         | 2.70 |
| 15                 | 17041         | 4.59 | 28282         | 4.37 | 20851         | 3.17 | 29429         | 4.27 |
| 20                 | 19229         | 4.71 | 28100         | 4.20 | 22930         | 3.62 | 30116         | 4.08 |
| 120                | 23551         | 4.76 | 27907         | 4.05 | 23812         | 3.39 | 28124         | 4.06 |

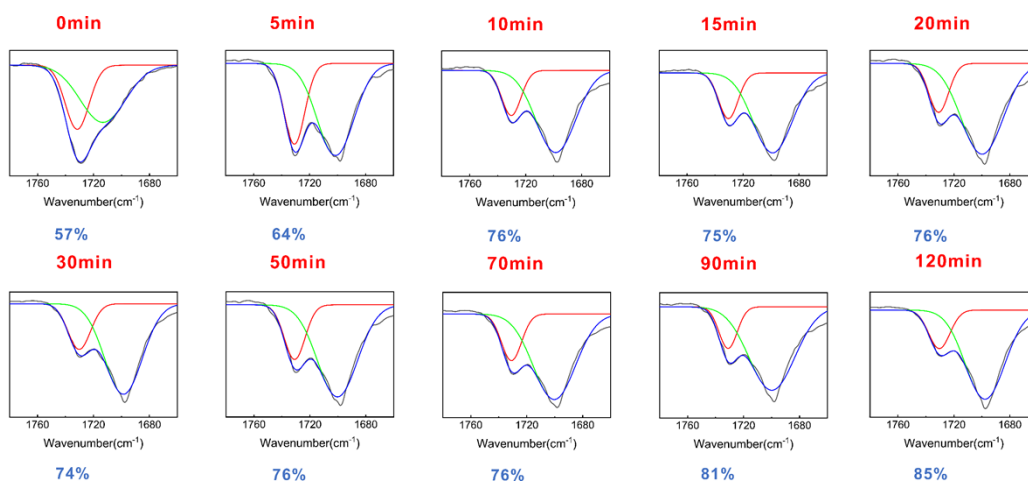

**Figure S1.** HBI from the C=O peak of Pre-SC/NCO-20 as a function of time during the *in-situ* polymerization and formation processes.

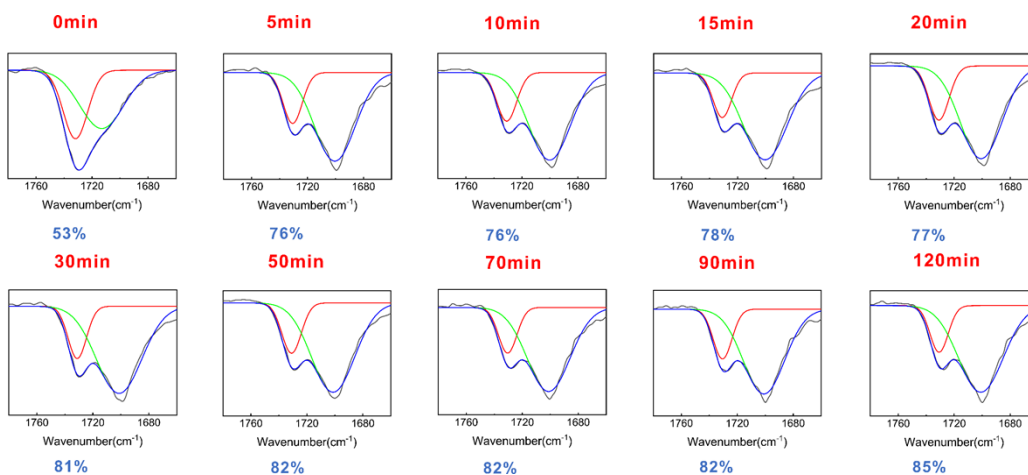

**Figure S2.** HBI from the C=O peak of Pre-SC/NCO-24 as a function of time during the *in-situ* polymerization and formation processes.

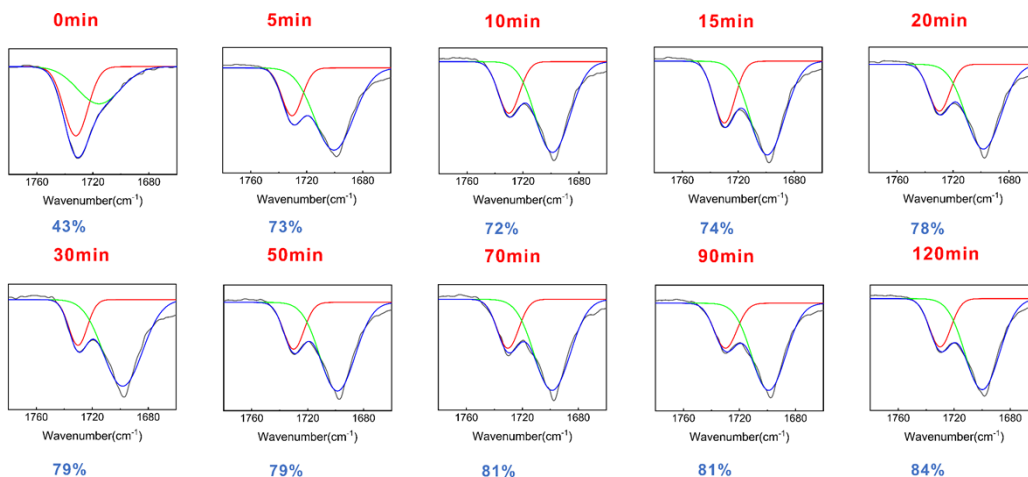

**Figure S3.** HBI from the C=O peak of Pre-LC/NCO-20 as a function of time during the *in-situ* polymerization and formation processes.

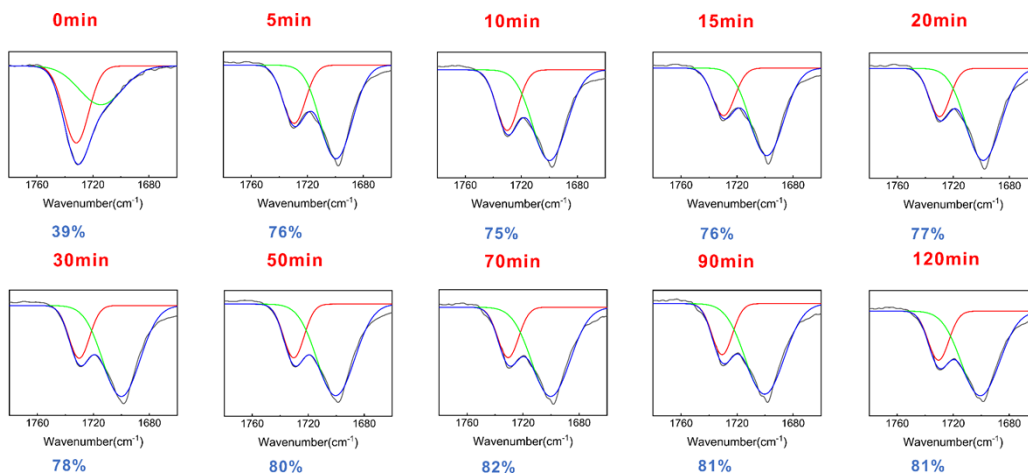

**Figure S4.** HBI from the C=O peak of Pre-LC/NCO-24 as a function of time during the *in-situ* polymerization and formation processes.

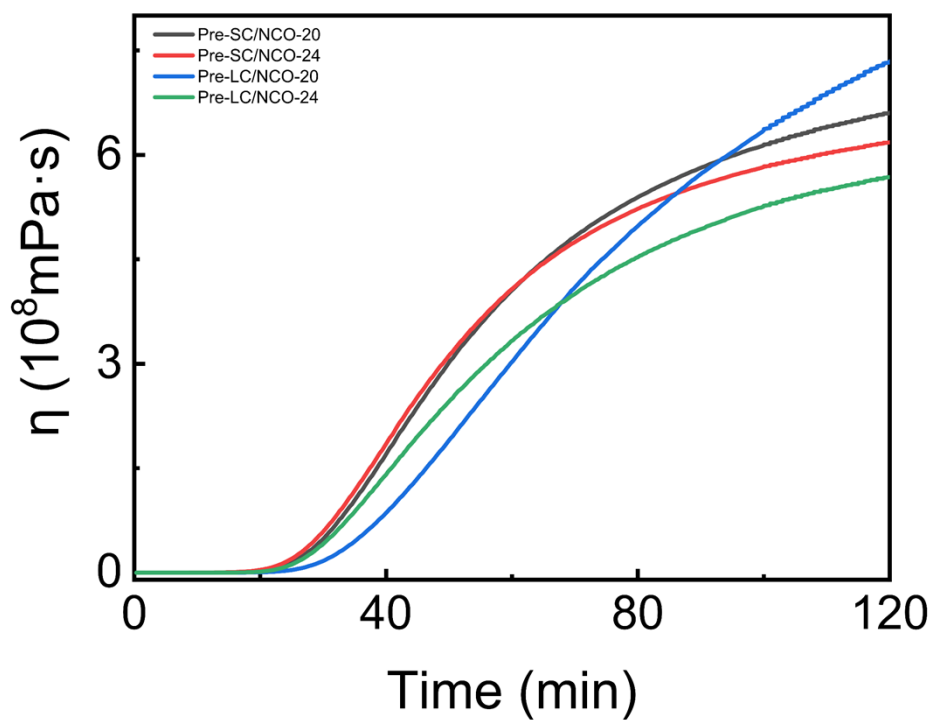

**Figure S5.** Complex viscosity ( $\eta$ ) of the RPU coatings as a function of time during the *in-situ* polymerization and formation processes.

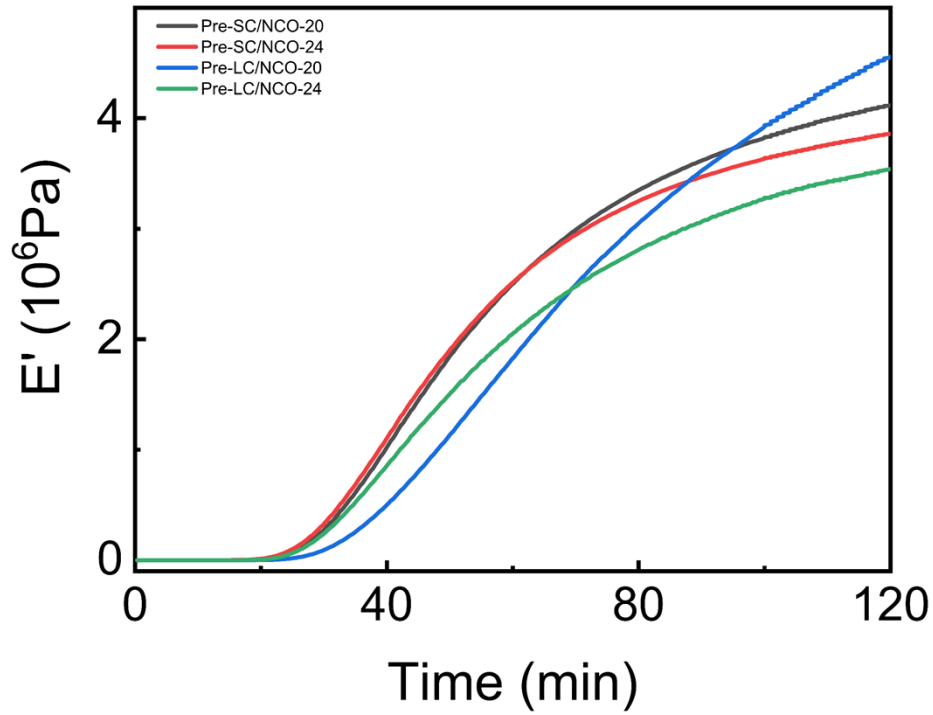

**Figure S6.** Storage modulus ( $E'$ ) of the RPU coatings as a function of time during the *in-situ* polymerization and formation processes.

The theoretical calculation formula for the free -NCO content in RPU prepolymer is as follows:

$$-NCO\% = \frac{\left[ \left( \frac{0.98m_{MDI}}{M_{MDI}} \right) - n_{PTMEG} - 1.5n_{TMP} \right] \times 2M_{-NCO}}{m_{MDI} + m_{PTMEG} + m_{TMP}} \times 100\% \quad \#(1)$$

$$m_{TMP} = (m_{MDI} + m_{PTMEG}) \times 2\% \quad \#(2)$$

$$n_{TMP} = \frac{(m_{MDI} + m_{PTMEG}) \times 2\%}{M_{TMP}} \quad \#(3)$$

in which the  $M_{-NCO}$  is 42.
